# Supplementary material for: Cultural Heritage for Sustainable Education Amidst Digitalisation
Source: MDPI journal article supplement (doi:10.3390/su16041540), 2024-02-11
Supplement: s1 [file s1]

Archive with 1 entries (1 files):
- sustainability-2725434-supplementary.pdf
